# Supplementary material for: Intra-Articular Corticosteroids in Addition to Exercise for Reducing Pain Sensitivity in Knee Osteoarthritis: Exploratory Outcome from a Randomized Controlled Trial
Source: PLoS One. 2016 Feb 12;11(2):e0149168. doi: 10.1371/journal.pone.0149168 (PMC4752217; doi:10.1371/journal.pone.0149168)
Supplement: S1 Data — (XLSX) [file pone.0149168.s002.xlsx]

## Sheet: Dataset-PainSens
PtID	Gruppe_XY	Age	Male	Week	Height	Weight	BMI	KL	PPT_0	PPT_obs	PPT_BOCF	PPT_imp	TempSum_0	TempSum_obs	TempSum_BOCF	TempSum_imp
1	Y	69.9	0	14	161	78	30.0914	3	11.74	12.39	12.39	12.39	35015.2	13294.1	13294.1	13294.1
1	Y	69.9	0	26	161	78	30.0914	3	11.74	12.1467	12.1467	12.1467	35015.2	24875.7	24875.7	24875.7
2	X	76	0	14	159	85	33.6221	4	18.04	15.94	15.94	15.94	30809.7	10798.4	10798.4	10798.4
2	X	76	0	26	159	85	33.6221	4	18.04	27.0433	27.0433	27.0433	30809.7	11910	11910	11910
3	X	64.1	0	14	174	71	23.4509	3	17.4533	15.9033	15.9033	15.9033	2958.36	20999.9	20999.9	20999.9
3	X	64.1	0	26	174	71	23.4509	3	17.4533	16.4433	16.4433	16.4433	2958.36	23327.7	23327.7	23327.7
4	X	59.2	1	14	183	94	28.0689	2	19.7133	25.8067	25.8067	25.8067	14824.9	0	0	0
4	X	59.2	1	26	183	94	28.0689	2	19.7133	15.7733	15.7733	15.7733	14824.9	10575.2	10575.2	10575.2
5	Y	45.7	1	14	181	91	27.7769	2	21.0667	20.42	20.42	20.42	13005.6		13005.6	9339.42
5	Y	45.7	1	26	181	91	27.7769	2	21.0667	22.2533	22.2533	22.2533	13005.6	3679.34	3679.34	3679.34
6	Y	69.5	0	14	174	100	33.0295	2	21.5367	19.21	19.21	19.21		21076.4	21076.4	21076.4
6	Y	69.5	0	26	174	100	33.0295	2	21.5367	20.3033	20.3033	20.3033		7894.57	7894.57	7894.57
7	X	64.4	1	14	196	94	24.469	2	21.39	31.8933	31.8933	31.8933	26227	507.09	507.09	507.09
7	X	64.4	1	26	196	94	24.469	2	21.39	13.59	13.59	13.59	26227	3384.74	3384.74	3384.74
8	Y	64	1	14	188	106	29.9909	4	20.6767	27.0567	27.0567	27.0567	5963.6	0	0	0
8	Y	64	1	26	188	106	29.9909	4	20.6767	25.3033	25.3033	25.3033	5963.6	16568.7	16568.7	16568.7
9	X	54.3	0	14	174	70	23.1206	4	19.03	28.15	28.15	28.15	13932.7	1634.01	1634.01	1634.01
9	X	54.3	0	26	174	70	23.1206	4	19.03	11.7733	11.7733	11.7733	13932.7	8266.35	8266.35	8266.35
10	X	65.7	0	14	172	74	25.0135	2	14.6333	15.8567	15.8567	15.8567	21992.4	11439.1	11439.1	11439.1
10	X	65.7	0	26	172	74	25.0135	2	14.6333		14.6333	15.76	21992.4		21992.4	6343.98
11	X	62.1	0	14	162	68	25.9107	3	7.60333	19.7467	19.7467	19.7467		17.1317	17.1317	17.1317
11	X	62.1	0	26	162	68	25.9107	3	7.60333	13.5767	13.5767	13.5767		6083.4	6083.4	6083.4
12	Y	64.8	1	14	181	97	29.6084	4	20.5767	16.28	16.28	16.28	14971.1	27874.1	27874.1	27874.1
12	Y	64.8	1	26	181	97	29.6084	4	20.5767	19.2433	19.2433	19.2433	14971.1	26921.3	26921.3	26921.3
13	Y	57.8	1	14	190	110	30.4709	4	23.1333	27.5767	27.5767	27.5767	13996.5	6015.88	6015.88	6015.88
13	Y	57.8	1	26	190	110	30.4709	4	23.1333		23.1333	19.96	13996.5		13996.5	562.18
14	Y	53.6	0	14	171	92	31.4627	2	9.11667	21.3433	21.3433	21.3433	12047.8	0	0	0
14	Y	53.6	0	26	171	92	31.4627	2	9.11667	14.8467	14.8467	14.8467	12047.8	8882.49	8882.49	8882.49
15	Y	71.7	0	14	161	72	27.7767	4	21.16	20.14	20.14	20.14	6372.99	30224.4	30224.4	30224.4
15	Y	71.7	0	26	161	72	27.7767	4	21.16	17.7933	17.7933	17.7933	6372.99	20480.6	20480.6	20480.6
16	X	80.8	0	14	159	69	27.2932	3	10.11		10.11	13.93				4414.12
16	X	80.8	0	26	159	69	27.2932	3	19.92		19.92	19.43				18863.1
17	X	53.8	0	14	175	105	34.2857	3	17.24	19.7	19.7	19.7	10432.5	16849.5	16849.5	16849.5
17	X	53.8	0	26	175	105	34.2857	3	17.24	19.9433	19.9433	19.9433	10432.5	13680.6	13680.6	13680.6
18	Y	45.2	0	14	170	76	26.2976	1	11.72		11.72	7.89	28035.5		28035.5	13436.1
18	Y	45.2	0	26	170	76	26.2976	1	11.72		11.72	17.55	28035.5		28035.5	3900.83
19	X	54.1	1	14	184	83	24.5156	3	40.4733	33.9267	33.9267	33.9267	8686.89	16039	16039	16039
19	X	54.1	1	26	184	83	24.5156	3	40.4733	24.19	24.19	24.19	8686.89	16122.6	16122.6	16122.6
20	Y	61.6	0	14	171	60	20.5191	2	10.5133	15.66	15.66	15.66	13639.7	10059.6	10059.6	10059.6
20	Y	61.6	0	26	171	60	20.5191	2	10.5133	13.5767	13.5767	13.5767	13639.7	9470.68	9470.68	9470.68
21	X	57.4	0	14	160	77	30.0781	2	14.0367	14.3767	14.3767	14.3767	19323.5	11069	11069	11069
21	X	57.4	0	26	160	77	30.0781	2	14.0367		14.0367	14.8	19323.5		19323.5	11124.1
22	Y	57.8	0	14	167	83	29.7608	1	19.2767	14.4067	14.4067	14.4067	26166	26219.4	26219.4	26219.4
22	Y	57.8	0	26	167	83	29.7608	1	19.2767	28.9633	28.9633	28.9633	26166	0	0	0
23	Y	44.1	1	14	186	88	25.4365	1	13.04		13.04	8.44	16173.1		16173.1	5514.64
23	Y	44.1	1	26	186	88	25.4365	1	13.04		13.04	14.2	16173.1		16173.1	3597.84
24	Y	63.2	1	14	187	106	30.3126	4	12.96	33.1467	33.1467	33.1467	9368.32	0	0	0
24	Y	63.2	1	26	187	106	30.3126	4	12.96	19.5567	19.5567	19.5567	9368.32	74.0481	74.0481	74.0481
25	X	62	1	14	175	104	33.9592	4	9.18333	11.6867	11.6867	11.6867	1590.35	0.35645	0.35645	0.35645
25	X	62	1	26	175	104	33.9592	4	9.18333	22.4167	22.4167	22.4167	1590.35	0	0	0
26	X	71.3	0	14	170	72	24.9135	4	21.8133		21.8133	14.03	28409.6		28409.6	6620.19
26	X	71.3	0	26	170	72	24.9135	4	21.8133		21.8133	11.76	28409.6		28409.6	21664.4
27	Y	61.9	1	14	174	73	24.1115	2	14.08	18.9	18.9	18.9	11118.3	3157.03	3157.03	3157.03
27	Y	61.9	1	26	174	73	24.1115	2	14.08	26	26	26	11118.3	6935.03	6935.03	6935.03
28	Y	49.9	1	14	191	101	27.6856	3	17.0933	18.6567	18.6567	18.6567	3589.58	4454.25	4454.25	4454.25
28	Y	49.9	1	26	191	101	27.6856	3	17.0933	34.2033	34.2033	34.2033	3589.58	0	0	0
29	Y	62.6	0	14	171	87	29.7527	2	13.72	12.4867	12.4867	12.4867	17883.5	11244.8	11244.8	11244.8
29	Y	62.6	0	26	171	87	29.7527	2	13.72	14.26	14.26	14.26	17883.5	10412.9	10412.9	10412.9
30	Y	74.8	0	14	169	55	19.257	2	14.4533	17.7933	17.7933	17.7933	11504.3	1010.95	1010.95	1010.95
30	Y	74.8	0	26	169	55	19.257	2	14.4533	13.0233	13.0233	13.0233	11504.3	16811.3	16811.3	16811.3
31	X	65.9	1	14	178	101	31.8773	3	15.4667	17.81	17.81	17.81	13304.1	18566.9	18566.9	18566.9
31	X	65.9	1	26	178	101	31.8773	3	15.4667	16.2133	16.2133	16.2133	13304.1	17015.2	17015.2	17015.2
32	X	67	1	14	172	93	31.4359	3	19.21	26.6667	26.6667	26.6667	17675.4	1872.41	1872.41	1872.41
32	X	67	1	26	172	93	31.4359	3	19.21	23.7367	23.7367	23.7367	17675.4	4210.65	4210.65	4210.65
33	X	60.4	1	14	183	111	33.1452	4	19.0967	19.91	19.91	19.91	12516	9371.98	9371.98	9371.98
33	X	60.4	1	26	183	111	33.1452	4	19.0967		19.0967	18.06	12516		12516	4162.01
34	X	76.4	0	14	168	76	26.9274	2	15.5633	15.0267	15.0267	15.0267	11334.9	7220.57	7220.57	7220.57
34	X	76.4	0	26	168	76	26.9274	2	15.5633	10.7433	10.7433	10.7433	11334.9	9477.75	9477.75	9477.75
35	Y	42.3	0	14	162	65	24.7676	2	23.85		23.85	22.24	22768.4		22768.4	8801.84
35	Y	42.3	0	26	162	65	24.7676	2	23.85		23.85	20.51	22768.4		22768.4	8949.77
36	Y	84.4	1	14	175	75	24.4898	3	16.3633	15.4033	15.4033	15.4033	1309.85	1897.59	1897.59	1897.59
36	Y	84.4	1	26	175	75	24.4898	3	16.3633	16.7367	16.7367	16.7367	1309.85	22729	22729	22729
37	X	74.8	0	14	158	64	25.6369	2	10.4833	17.8733	17.8733	17.8733	14184.2	0	0	0
37	X	74.8	0	26	158	64	25.6369	2	10.4833	22.35	22.35	22.35	14184.2	10.3223	10.3223	10.3223
38	X	73.5	1	14	176	76	24.5351	2	14.5533	9.46	9.46	9.46	14063.1	21382.6	21382.6	21382.6
38	X	73.5	1	26	176	76	24.5351	2	14.5533	16.1167	16.1167	16.1167	14063.1	7627.24	7627.24	7627.24
39	Y	64.4	0	14	165	72	26.4463	2	21.8133	14.2467	14.2467	14.2467	25351.5	23718.8	23718.8	23718.8
39	Y	64.4	0	26	165	72	26.4463	2	21.8133	12.21	12.21	12.21	25351.5	13515.9	13515.9	13515.9
40	Y	43.9	1	14	174	101	33.3598	2	16.59	14.13	14.13	14.13	17371.5	19896	19896	19896
40	Y	43.9	1	26	174	101	33.3598	2	16.59		16.59	27.38	17371.5		17371.5	6395.07
41	Y	73.7	0	14	162	90	34.2936	4	16.18	19.36	19.36	19.36	4166.42	0.07324	0.07324	0.07324
41	Y	73.7	0	26	162	90	34.2936	4	16.18	21.65	21.65	21.65	4166.42	0	0	0
42	X	59.4	0	14	153	77	32.8933	3	11.4633	20.2867	20.2867	20.2867	10903.3	1900.19	1900.19	1900.19
42	X	59.4	0	26	153	77	32.8933	3	11.4633	12.8133	12.8133	12.8133	10903.3	647.043	647.043	647.043
43	X	73.8	0	14	180	99	30.5556	3	20.1067	22.7767	22.7767	22.7767	10609.4	3629.91	3629.91	3629.91
43	X	73.8	0	26	180	99	30.5556	3	20.1067	19.2767	19.2767	19.2767	10609.4	10173.7	10173.7	10173.7
44	Y	48.3	0	14	170	90	31.1419	3	15.0933	12.3867	12.3867	12.3867	7997.68	4605.63	4605.63	4605.63
44	Y	48.3	0	26	170	90	31.1419	3	15.0933	13.48	13.48	13.48	7997.68	3019.78	3019.78	3019.78
45	X	70.7	0	14	169	80	28.0102	3	23.8367	31.0333	31.0333	31.0333	3020.7	0	0	0
45	X	70.7	0	26	169	80	28.0102	3	23.8367	24.21	24.21	24.21	3020.7	10701.6	10701.6	10701.6
46	Y	72.1	0	14	161	70	27.0051	4	13.82	10.89	10.89	10.89	22587	20149.5	20149.5	20149.5
46	Y	72.1	0	26	161	70	27.0051	4	13.82	13.07	13.07	13.07	22587	17830.2	17830.2	17830.2
47	X	50.3	1	14	172	71	23.9995	2	11.8533	9.26333	9.26333	9.26333	24121.3	27761.9	27761.9	27761.9
47	X	50.3	1	26	172	71	23.9995	2	11.8533	10.01	10.01	10.01	24121.3	30112	30112	30112
48	X	73.2	1	14	155	76	31.6337	3	20.43		20.43	18.57	21007.8		21007.8	10446.1
48	X	73.2	1	26	155	76	31.6337	3	20.43		20.43	26.35	21007.8		21007.8	19966
49	Y	65.9	1	14	179	94	29.3374	4	21.62	15.4667	15.4667	15.4667	5096.74	13186.5	13186.5	13186.5
49	Y	65.9	1	26	179	94	29.3374	4	21.62	11.5267	11.5267	11.5267	5096.74	17526.3	17526.3	17526.3
50	Y	79.4	1	14	184	83	24.5156	3	21.4233	17.1267	17.1267	17.1267	5845.74	15761.5	15761.5	15761.5
50	Y	79.4	1	26	184	83	24.5156	3	21.4233	22.2867	22.2867	22.2867	5845.74	3925.64	3925.64	3925.64
51	X	53.4	0	14	167	70	25.0995	4	35.3767	28.26	28.26	28.26	9077.95	32165.9	32165.9	32165.9
51	X	53.4	0	26	167	70	25.0995	4	35.3767	23.2333	23.2333	23.2333	9077.95	30755.5	30755.5	30755.5
52	Y	64.9	0	14	171	92	31.4627	2	17.9733	22.5133	22.5133	22.5133	34609.7	8263.61	8263.61	8263.61
52	Y	64.9	0	26	171	92	31.4627	2	17.9733	24.86	24.86	24.86	34609.7	2245.85	2245.85	2245.85
53	X	62.8	1	14	176	81	26.1493	2	16.7367	15.3833	15.3833	15.3833	19834.1	14478.7	14478.7	14478.7
53	X	62.8	1	26	176	81	26.1493	2	16.7367		16.7367	28.5	19834.1		19834.1	15067.8
54	X	59.9	0	14	173	89	29.737	4	8.97	13.9833	13.9833	13.9833	3886.57	0	0	0
54	X	59.9	0	26	173	89	29.737	4	8.97	11.09	11.09	11.09	3886.57	6036.02	6036.02	6036.02
55	X	84.2	1	14	178	91	28.7211	4	22.1867	15.22	15.22	15.22	23731.6	18904.2	18904.2	18904.2
55	X	84.2	1	26	178	91	28.7211	4	22.1867	13.9867	13.9867	13.9867	23731.6	22551.3	22551.3	22551.3
56	Y	61.1	0	14	159	84	33.2265	3	18.0533	23.5233	23.5233	23.5233	20362.1	8647.41	8647.41	8647.41
56	Y	61.1	0	26	159	84	33.2265	3	18.0533	25.5267	25.5267	25.5267	20362.1	1406.14	1406.14	1406.14
57	Y	57.4	0	14	154	83	34.9975	3	17.37	27.76	27.76	27.76	11301.2	0	0	0
57	Y	57.4	0	26	154	83	34.9975	3	17.37	24.21	24.21	24.21	11301.2		11301.2	23106.3
58	X	46.2	0	14	170	95	32.872	2	16.0033	25.2867	25.2867	25.2867	7223.53	1266.82	1266.82	1266.82
58	X	46.2	0	26	170	95	32.872	2	16.0033		16.0033	12.1	7223.53		7223.53	2045.38
59	X	64.7	1	14	170	81	28.0277	4	19.3733	41.0567	41.0567	41.0567	1871.67	0	0	0
59	X	64.7	1	26	170	81	28.0277	4	19.3733	24.2433	24.2433	24.2433	1871.67	0	0	0
60	Y	77.8	1	14	179	80	24.968	3	31.63	26.715	26.715	26.715	22216.8	12723.4	12723.4	12723.4
60	Y	77.8	1	26	179	80	24.968	3	31.63	25.1033	25.1033	25.1033	22216.8	30547.4	30547.4	30547.4
61	X	53.3	0	14	170	81	28.0277	2	20.3033	14.6667	14.6667	14.6667	22902.4	14237.8	14237.8	14237.8
61	X	53.3	0	26	170	81	28.0277	2	20.3033	19.08	19.08	19.08	22902.4	16953.3	16953.3	16953.3
62	Y	61	0	14	162	81	30.8642	3	10.4533	8.81	8.81	8.81	18810.8	18087.4	18087.4	18087.4
62	Y	61	0	26	162	81	30.8642	3	10.4533	7.91333	7.91333	7.91333	18810.8	0	0	0
63	X	70.2	0	14	168	77	27.2817	2	10.0133	7.50333	7.50333	7.50333	22691.8	24541.8	24541.8	24541.8
63	X	70.2	0	26	168	77	27.2817	2	10.0133	7.96	7.96	7.96	22691.8	11136.9	11136.9	11136.9
64	Y	64.9	1	14	191	114	31.2491	3	20.04	26.6033	26.6033	26.6033	3417.81	269.088	269.088	269.088
64	Y	64.9	1	26	191	114	31.2491	3	20.04	19.08	19.08	19.08	3417.81	2153.14	2153.14	2153.14
65	Y	62.5	0	14	172	103	34.8161	2	18.8033	27.0267	27.0267	27.0267	17847.5	4260.3	4260.3	4260.3
65	Y	62.5	0	26	172	103	34.8161	2	18.8033	20.1367	20.1367	20.1367	17847.5	5792.31	5792.31	5792.31
66	Y	61.7	0	14	169	99	34.6627	2	18.4633	16.28	16.28	16.28	15115.2	9983.79	9983.79	9983.79
66	Y	61.7	0	26	169	99	34.6627	2	18.4633	20.6733	20.6733	20.6733	15115.2	6233.96	6233.96	6233.96
67	Y	57	0	14	168	97	34.3679	2	25.22	26.96	26.96	26.96	11826.9	15361.5	15361.5	15361.5
67	Y	57	0	26	168	97	34.3679	2	25.22	17.3733	17.3733	17.3733	11826.9	12690.3	12690.3	12690.3
68	X	58.6	0	14	160	77	30.0781	3	15.8733	11.3333	11.3333	11.3333	7514.53	16659.3	16659.3	16659.3
68	X	58.6	0	26	160	77	30.0781	3	15.8733	13.7567	13.7567	13.7567	7514.53	0	0	0
69	X	71.9	0	14	168	87	30.8248	4	27.22	21.1967	21.1967	21.1967	13512	2942.51	2942.51	2942.51
69	X	71.9	0	26	168	87	30.8248	4	27.22	27.7567	27.7567	27.7567	13512	17523.1	17523.1	17523.1
70	X	70.5	1	14	172	74	25.0135	4	10.65	11.3333	11.3333	11.3333	7919.43	6528.41	6528.41	6528.41
70	X	70.5	1	26	172	74	25.0135	4	10.65	10.6967	10.6967	10.6967	7919.43	3283.96	3283.96	3283.96
71	X	71.9	1	14	191	89	24.3963	2	19.03	14.75	14.75	14.75	7668.29	20538.2	20538.2	20538.2
71	X	71.9	1	26	191	89	24.3963	2	19.03	17.53	17.53	17.53	7668.29	0	0	0
72	Y	69.2	1	14	179	107	33.3947	4	28.23	23.4233	23.4233	23.4233	12473.3	15882.1	15882.1	15882.1
72	Y	69.2	1	26	179	107	33.3947	4	28.23	32.8	32.8	32.8	12473.3	10514.8	10514.8	10514.8
73	X	62.3	0	14	164	78	29.0006	2	13.0733	13.4333	13.4333	13.4333	16710.5	10243.4	10243.4	10243.4
73	X	62.3	0	26	164	78	29.0006	2	13.0733	19.8467	19.8467	19.8467	16710.5	549.857	549.857	549.857
74	Y	48.4	1	14	177	74	23.6203	2	13.04	14.65	14.65	14.65	3068.27	9475.57	9475.57	9475.57
74	Y	48.4	1	26	177	74	23.6203	2	13.04	15.9533	15.9533	15.9533	3068.27	2978.9	2978.9	2978.9
75	X	54.2	0	14	164	91	33.834	2	14.62	14.5233	14.5233	14.5233	23407.1	2486.02	2486.02	2486.02
75	X	54.2	0	26	164	91	33.834	2	14.62	18.87	18.87	18.87	23407.1	534.147	534.147	534.147
76	X	74.8	0	14	160	81	31.6406	2	20.1067	16.98	16.98	16.98	9272.59	21755.8	21755.8	21755.8
76	X	74.8	0	26	160	81	31.6406	2	20.1067	17.8433	17.8433	17.8433	9272.59	11434.8	11434.8	11434.8
77	Y	64.5	0	14	162	80	30.4832	2	13.6767	12.86	12.86	12.86	8264.56	2053.42	2053.42	2053.42
77	Y	64.5	0	26	162	80	30.4832	2	13.6767	13.71	13.71	13.71	8264.56	1589.25	1589.25	1589.25
78	Y	65.3	0	14	163	65	24.4646	4	16.6833	12.9767	12.9767	12.9767	722.854	17115.5	17115.5	17115.5
78	Y	65.3	0	26	163	65	24.4646	4	16.6833	16.0333	16.0333	16.0333	722.854	12039.3	12039.3	12039.3
79	Y	44.1	1	14	186	95	27.4598	1	21.7	19.42	19.42	19.42	13340.9	13409.7	13409.7	13409.7
79	Y	44.1	1	26	186	95	27.4598	1	21.7	20.8533	20.8533	20.8533	13340.9	15880.5	15880.5	15880.5
80	X	62.8	0	14	165	75	27.5482	3	15.9733	17.94	17.94	17.94	14668.5	4607.34	4607.34	4607.34
80	X	62.8	0	26	165	75	27.5482	3	15.9733	13.0233	13.0233	13.0233	14668.5	5919.35	5919.35	5919.35
81	Y	59.8	0	14	169	72	25.2092	2	16.3133	12.2133	12.2133	12.2133	14995.4	7169.93	7169.93	7169.93
81	Y	59.8	0	26	169	72	25.2092	2	16.3133	16.95	16.95	16.95	14995.4	8582.45	8582.45	8582.45
82	Y	54	0	14	166	92	33.3866	2	14.4067	14.08	14.08	14.08	10627.1	6853.1	6853.1	6853.1
82	Y	54	0	26	166	92	33.3866	2	14.4067	13.4133	13.4133	13.4133	10627.1	5152.54	5152.54	5152.54
83	Y	68.1	0	14	159	83	32.831	3	10.21	8.97	8.97	8.97				13123.1
83	Y	68.1	0	26	159	83	32.831	3	10.21	8.72333	8.72333	8.72333				12188.9
84	X	73.1	1	14	170	82	28.3737	4	21.8333		21.8333	8.87	19268.9		19268.9	348.45
84	X	73.1	1	26	170	82	28.3737	4	21.8333		21.8333	19.31	19268.9		19268.9	12481.2
85	X	72.3	0	14	160	77	30.0781	2	16.0033	15.92	15.92	15.92	20924.6	23000.2	23000.2	23000.2
85	X	72.3	0	26	160	77	30.0781	2	16.0033	13.3333	13.3333	13.3333	20924.6	18571.3	18571.3	18571.3
86	X	62.7	0	14	156	76	31.2295	3	20.8867	22.4333	22.4333	22.4333	25878.4	2552.16	2552.16	2552.16
86	X	62.7	0	26	156	76	31.2295	3	20.8867	25.12	25.12	25.12	25878.4	2605.65	2605.65	2605.65
87	X	70	1	14	180	106	32.716	4	33	41.6767	41.6767	41.6767	1371.67	1438.16	1438.16	1438.16
87	X	70	1	26	180	106	32.716	4	33	36.3367	36.3367	36.3367	1371.67	2006.8	2006.8	2006.8
88	X	76.3	0	14	170	88	30.4498	3	18.38	15.81	15.81	15.81	12950.3	15459.2	15459.2	15459.2
88	X	76.3	0	26	170	88	30.4498	3	18.38	17.5833	17.5833	17.5833	12950.3	10830.2	10830.2	10830.2
89	Y	60	1	14	180	93	28.7037	2	12.3567	10.6933	10.6933	10.6933	2229.05	502.44	502.44	502.44
89	Y	60	1	26	180	93	28.7037	2	12.3567	9.96333	9.96333	9.96333	2229.05	733.499	733.499	733.499
90	Y	65.6	1	14	177	87	27.7698	3	14.2133	10.4867	10.4867	10.4867	5158.56	12119.7	12119.7	12119.7
90	Y	65.6	1	26	177	87	27.7698	3	14.2133	12.2567	12.2567	12.2567	5158.56	10383.9	10383.9	10383.9
91	X	64.5	0	14	155	70	29.1363	3	10.7267		10.7267	6.99	23263.1		23263.1	22837.1
91	X	64.5	0	26	155	70	29.1363	3	10.7267		10.7267	14.59	23263.1		23263.1	12444.5
92	Y	67.2	1	14	185	102	29.8028	3	23.82	30.6867	30.6867	30.6867	9892.25	11822	11822	11822
92	Y	67.2	1	26	185	102	29.8028	3	23.82	20.95	20.95	20.95	9892.25	22413.7	22413.7	22413.7
93	Y	46.4	1	14	187	117	33.4582	2	36.7133	18.0367	18.0367	18.0367	17698.2	13217.5	13217.5	13217.5
93	Y	46.4	1	26	187	117	33.4582	2	36.7133	28.57	28.57	28.57	17698.2	13451.5	13451.5	13451.5
94	Y	68.1	1	14	173	72	24.0569	3	26.4067	23.4067	23.4067	23.4067	7809.76	12958.8	12958.8	12958.8
94	Y	68.1	1	26	173	72	24.0569	3	26.4067	15.45	15.45	15.45	7809.76	17799	17799	17799
95	X	70.3	0	14	169	100	35.0128	2	18.33	18.32	18.32	18.32	20729.9	28067.1	28067.1	28067.1
95	X	70.3	0	26	169	100	35.0128	2	18.33	18.5267	18.5267	18.5267	20729.9	14935.4	14935.4	14935.4
96	X	66	0	14	154	74	31.2026	4	26.4533	24.1433	24.1433	24.1433	19140.8	20206.6	20206.6	20206.6
96	X	66	0	26	154	74	31.2026	4	26.4533	15.0433	15.0433	15.0433	19140.8	24943.2	24943.2	24943.2
97	Y	59.8	0	14	161	81	31.2488	2	16.85	14.5533	14.5533	14.5533	19879	2715.1	2715.1	2715.1
97	Y	59.8	0	26	161	81	31.2488	2	16.85	12.94	12.94	12.94	19879	20478.1	20478.1	20478.1
98	Y	63	0	14	158	57	22.8329	3	29.89	36.1267	36.1267	36.1267	15775.4	10470.9	10470.9	10470.9
98	Y	63	0	26	158	57	22.8329	3	29.89	13.1867	13.1867	13.1867	15775.4	11013.4	11013.4	11013.4
99	X	67.8	0	14	162	83	31.6263	4	29.0267	22.6467	22.6467	22.6467	22196.9	8344.2	8344.2	8344.2
99	X	67.8	0	26	162	83	31.6263	4	29.0267	21.0633	21.0633	21.0633	22196.9	22011.4	22011.4	22011.4
100	X	61.4	0	14	162	76	28.959	3	35	26.91	26.91	26.91	26354.7	9849.66	9849.66	9849.66
100	X	61.4	0	26	162	76	28.959	3	35	15.1733	15.1733	15.1733	26354.7	4219.11	4219.11	4219.11
